# Supplementary material
Source: MDPI journal article supplement (https://www.mdpi.com/1999-4907/10/4/310)
Supplement: s1 [file s1]

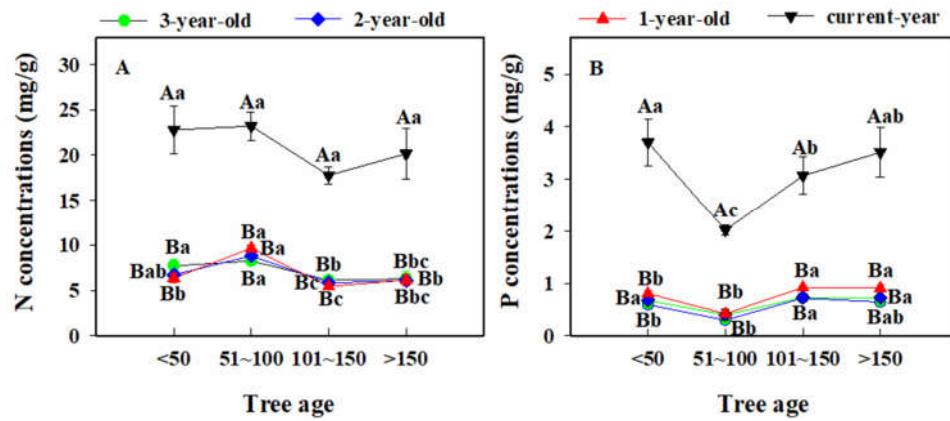

**Figure S1.** Differences in leaf N concentrations (A) and leaf P concentrations (B) between four years' leaves (from current-year-old and up to 3-year-old) collected along different tree ages levels. Different uppercase letters represent significant differences among leaf ages at each tree age level, while different lowercase letters represent significant differences among tree ages at each leaf age level.
